# Supplementary material
Source: Springer Nature journal article supplement (https://www.springermedizin.de/resource/supplementary/12888_2011_1205_MOESM2_ESM.pdf/9480648)

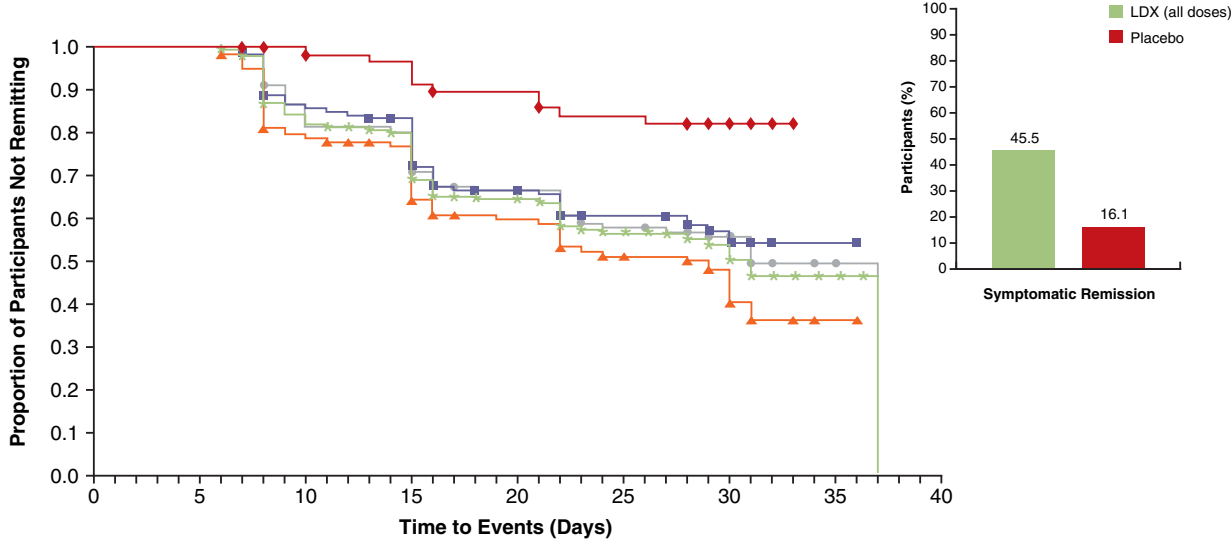

Treatment Groups: ●●● 30 mg/d LDX ■■■ 50 mg/d LDX ▲▲▲ 70 mg/d LDX \*-\*-\* All Doses ◆◆◆ Placebo

Supplement: MOESM2 [file 9480648]
